# Supplementary material for: Clinical characterization and therapeutic targets of vitamin A in patients with hepatocholangiocarcinoma and coronavirus disease
Source: publisher site journal article supplement (doi:10.18632/aging.203220), 2021-06-27
Supplement: Supplementary file [file aging-v13i12-203220-supplementary-material-SD1.pdf]

## SUPPLEMENTARY TABLES

**Supplementary Table 1. List of CHOL/COVID-19/VA-associated genes.**

| <b>Query</b> | <b>Entrez</b> | <b>Symbol</b> | <b>Name</b>                        | <b>Comment</b> |
|--------------|---------------|---------------|------------------------------------|----------------|
| BRD2         | 6046          | BRD2          | bromodomain containing 2           | 1              |
| NOS2         | 4843          | NOS2          | nitric oxide synthase 2            | 1              |
| GPT          | 2875          | GPT           | glutamic--pyruvic transaminase     | 1              |
| MAPK1        | 5594          | MAPK1         | mitogen-activated protein kinase 1 | 1              |
| CXCR3        | 2833          | CXCR3         | C-X-C motif chemokine receptor 3   | 1              |
| ICAM1        | 3383          | ICAM1         | intercellular adhesion molecule 1  | 1              |
| CDK4         | 1019          | CDK4          | cyclin dependent kinase 4          | 1              |
| CAT          | 847           | CAT           | catalase                           | 1              |
| TMPRSS13     | 84000         | TMPRSS13      | transmembrane serine protease 13   | 1              |

**Supplementary Table 2. Alteration of biological processes.**

| ONTOLOGY | ID         | Description                                             | GeneRatio | BgRatio   | pvalue   | p.adjust | qvalue   | geneID                  | Count | Remark       |
|----------|------------|---------------------------------------------------------|-----------|-----------|----------|----------|----------|-------------------------|-------|--------------|
| BP       | GO:0070482 | response to oxygen levels                               | 4/9       | 394/18670 | 2.26E-05 | 0.001975 | 0.001018 | NOS2/ICAM1/<br>CDK4/CAT | 4     | Inflammatory |
| BP       | GO:0055093 | response to hyperoxia                                   | 2/9       | 21/18670  | 4.32E-05 | 0.003348 | 0.001727 | CDK4/CAT                | 2     | Inflammatory |
| BP       | GO:0036296 | response to increased oxygen levels                     | 2/9       | 28/18670  | 7.76E-05 | 0.004923 | 0.002539 | CDK4/CAT                | 2     | Inflammatory |
| BP       | GO:0072593 | reactive oxygen species metabolic process               | 3/9       | 284/18670 | 0.000273 | 0.013629 | 0.007029 | NOS2/ICAM1/<br>CAT      | 3     | Inflammatory |
| BP       | GO:1903409 | reactive oxygen species biosynthetic process            | 2/9       | 122/18670 | 0.00148  | 0.024627 | 0.012702 | NOS2/ICAM1              | 2     | Inflammatory |
| BP       | GO:0072678 | T cell migration                                        | 2/9       | 65/18670  | 0.000423 | 0.01512  | 0.007798 | CXCR3/ICAM1             | 2     | Immunity     |
| BP       | GO:0006625 | protein targeting to peroxisome                         | 2/9       | 68/18670  | 0.000463 | 0.01512  | 0.007798 | NOS2/CAT                | 2     | Immunity     |
| BP       | GO:0072662 | protein localization to peroxisome                      | 2/9       | 68/18670  | 0.000463 | 0.01512  | 0.007798 | NOS2/CAT                | 2     | Immunity     |
| BP       | GO:0072663 | establishment of protein localization to peroxisome     | 2/9       | 68/18670  | 0.000463 | 0.01512  | 0.007798 | NOS2/CAT                | 2     | Immunity     |
| BP       | GO:0043574 | peroxisomal transport                                   | 2/9       | 69/18670  | 0.000477 | 0.01512  | 0.007798 | NOS2/CAT                | 2     | Immunity     |
| BP       | GO:0001666 | response to hypoxia                                     | 3/9       | 359/18670 | 0.000543 | 0.01634  | 0.008427 | NOS2/ICAM1/<br>CAT      | 3     | Immunity     |
| BP       | GO:0036293 | response to decreased oxygen levels                     | 3/9       | 370/18670 | 0.000593 | 0.01634  | 0.008427 | NOS2/ICAM1/<br>CAT      | 3     | Immunity     |
| BP       | GO:0001910 | regulation of leukocyte mediated cytotoxicity           | 2/9       | 78/18670  | 0.000609 | 0.01634  | 0.008427 | NOS2/ICAM1              | 2     | Immunity     |
| BP       | GO:0007031 | peroxisome organization                                 | 2/9       | 81/18670  | 0.000656 | 0.016763 | 0.008646 | NOS2/CAT                | 2     | Immunity     |
| BP       | GO:0051090 | regulation of DNA-binding transcription factor activity | 3/9       | 432/18670 | 0.000931 | 0.019116 | 0.009859 | MAPK1/ICAM1/<br>CAT     | 3     | Immunity     |
| BP       | GO:0031341 | regulation of cell killing                              | 2/9       | 98/18670  | 0.000959 | 0.019116 | 0.009859 | NOS2/ICAM1              | 2     | Immunity     |
| BP       | GO:0072676 | lymphocyte migration                                    | 2/9       | 111/18670 | 0.001227 | 0.021964 | 0.011328 | CXCR3/ICAM1             | 2     | Immunity     |
| BP       | GO:0042133 | neurotransmitter metabolic process                      | 2/9       | 153/18670 | 0.002313 | 0.032948 | 0.016993 | NOS2/ICAM1              | 2     | Immunity     |
| BP       | GO:0001906 | cell killing                                            | 2/9       | 168/18670 | 0.00278  | 0.038807 | 0.020015 | NOS2/ICAM1              | 2     | Immunity     |
| BP       | GO:0002685 | regulation of leukocyte migration                       | 2/9       | 196/18670 | 0.003761 | 0.046872 | 0.024175 | CXCR3/ICAM1             | 2     | Immunity     |
| BP       | GO:0071346 | cellular response to interferon-gamma                   | 2/9       | 180/18670 | 0.003183 | 0.043191 | 0.022276 | NOS2/ICAM1              | 2     | Cytokine     |
| BP       | GO:0034341 | response to interferon-gamma                            | 2/9       | 199/18670 | 0.003874 | 0.047438 | 0.024467 | NOS2/ICAM1              | 2     | Cytokine     |

**Supplementary Table 3. Alteration of KEGG pathways.**

| <b>ID</b> | <b>Description</b>                              | <b>GeneRatio</b> | <b>BgRatio</b> | <b>pvalue</b> | <b>p.adjust</b> | <b>qvalue</b> | <b>geneID</b>    | <b>Count</b> | <b>Remark</b> |
|-----------|-------------------------------------------------|------------------|----------------|---------------|-----------------|---------------|------------------|--------------|---------------|
| hsa05164  | Influenza A                                     | 3/7              | 171/8047       | 0.00031       | 0.014567        | 0.009679      | MAPK1/ICAM1/CDK4 | 3            | Viral         |
| hsa05167  | Kaposi sarcoma-associated herpesvirus infection | 3/7              | 189/8047       | 0.000416      | 0.014676        | 0.009751      | MAPK1/ICAM1/CDK4 | 3            | Viral         |
| hsa05166  | Human T-cell leukemia virus 1 infection         | 3/7              | 219/8047       | 0.000642      | 0.015083        | 0.010021      | MAPK1/ICAM1/CDK4 | 3            | Viral         |
| hsa05145  | Toxoplasmosis                                   | 2/7              | 112/8047       | 0.003852      | 0.025864        | 0.017185      | NOS2/MAPK1       | 2            | Viral         |
| hsa05160  | Hepatitis C                                     | 2/7              | 156/8047       | 0.007356      | 0.034574        | 0.022972      | MAPK1/CDK4       | 2            | Viral         |
| hsa05169  | Epstein-Barr virus infection                    | 2/7              | 202/8047       | 0.012117      | 0.049748        | 0.033054      | ICAM1/CDK4       | 2            | Viral         |
| hsa05203  | Viral carcinogenesis                            | 2/7              | 204/8047       | 0.012349      | 0.049748        | 0.033054      | MAPK1/CDK4       | 2            | Viral         |
| hsa04146  | Peroxisome                                      | 2/7              | 83/8047        | 0.002134      | 0.021497        | 0.014283      | NOS2/CAT         | 2            | Immunity      |
| hsa04660  | T cell receptor signaling pathway               | 2/7              | 104/8047       | 0.00333       | 0.025864        | 0.017185      | MAPK1/CDK4       | 2            | Immunity      |
| hsa04650  | Natural killer cell mediated cytotoxicity       | 2/7              | 131/8047       | 0.005235      | 0.029527        | 0.019619      | MAPK1/ICAM1      | 2            | Immunity      |
| hsa04066  | HIF-1 signaling pathway                         | 2/7              | 109/8047       | 0.003652      | 0.025864        | 0.017185      | NOS2/MAPK1       | 2            | Signaling     |
| hsa04668  | TNF signaling pathway                           | 2/7              | 112/8047       | 0.003852      | 0.025864        | 0.017185      | MAPK1/ICAM1      | 2            | Signaling     |
| hsa04926  | Relaxin signaling pathway                       | 2/7              | 129/8047       | 0.00508       | 0.029527        | 0.019619      | NOS2/MAPK1       | 2            | Signaling     |
| hsa04068  | FoxO signaling pathway                          | 2/7              | 131/8047       | 0.005235      | 0.029527        | 0.019619      | MAPK1/CAT        | 2            | Signaling     |
| hsa04371  | Apelin signaling pathway                        | 2/7              | 137/8047       | 0.005713      | 0.030985        | 0.020587      | NOS2/MAPK1       | 2            | Signaling     |
| hsa04062  | Chemokine signaling pathway                     | 2/7              | 189/8047       | 0.010662      | 0.045556        | 0.030269      | MAPK1/CXCR3      | 2            | Signaling     |
